# Supplementary material for: Valorization of Seawater Reverse Osmosis Brine by Monovalent Ion-Selective Membranes through Electrodialysis
Source: MDPI journal article supplement (doi:10.3390/membranes13060562), 2023-05-30
Supplement: s1 [file s1]

Article

# Valorization of Seawater Reverse Osmosis Brine by Monovalent Ion-Selective Membranes through Electrodialysis

Prem P. Sharma <sup>1</sup>, Shabin Mohammed <sup>1</sup>, Jamaliah Aburabie<sup>1</sup> and Raed Hashaikeh <sup>1, \*</sup>

<sup>1</sup> NYUAD Water Research Center, Engineering Division, New York University Abu Dhabi, Abu Dhabi, P.O. Box 129188, United Arab Emirates

\* Correspondence: Raed.Hashaikeh@nyu.edu

Number of pages:2

Number of figures:2

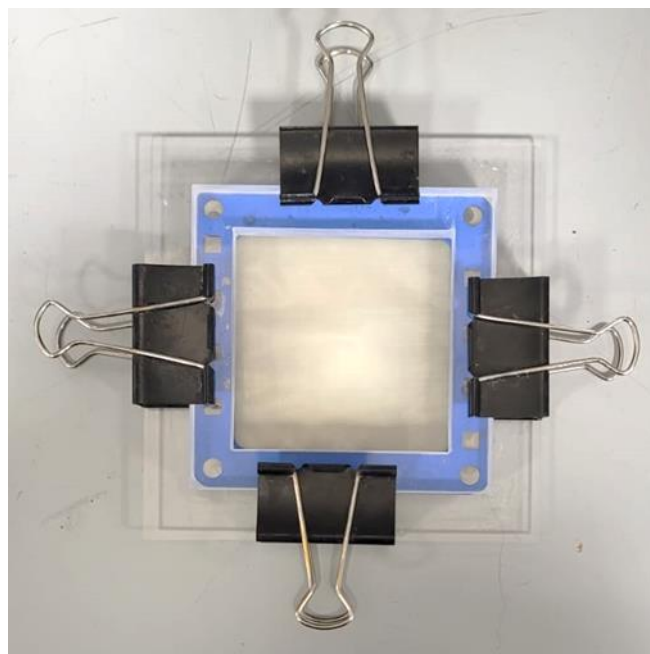

**Figure S1:** Custom-made frame set-up for membrane fabrication through interfacial polymerization.

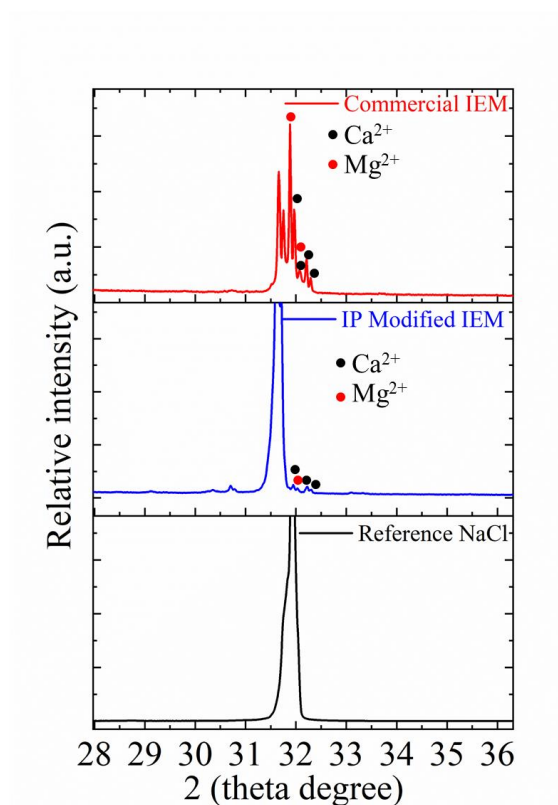

**Figure S2:** XRD spectra of the product obtained as a result of electro dialysis.

## References

1. Rashad, M. M., Baioumy, H. M. Chemical processing of dolomite associated with the phosphorites for production of magnesium sulfate heptahydrate. *European Journal of Mineral Processing & Environmental Protection*, **2005**, 2, 5.
2. Ziegenheim, S., Szabados, M., Kónya, Z., Kukovecz, Á., Pálinkó, I., & Sipos, P. Differential precipitation of Mg (OH) from  $\text{CaSO}_4 \cdot 2\text{H}_2\text{O}$  using citrate as inhibitor—A promising concept for reagent recovery from  $\text{MgSO}_4$  waste streams. *Molecules*, **2020**, 25, 5012.
